# Supplementary material
Source: ML conference proceedings conference paper supplement (https://openaccess.thecvf.com/content/WACV2022/html/Watson_Agree_To_Disagree_WACV_2022_paper.html)
Supplement: Supplementary file 1 [file Watson_Agree_To_Disagree_WACV_2022_supplemental.pdf]

## Agree to Disagree: Supplementary Material

Matthew Watson, Bashar Awwad Shiekh Hasan, Noura Al Moubayed  
Durham University  
Durham, UK

{matthew.s.watson,bashar.awwad-shiekh-hasan,noura.al-moubayed}@durham.ac.uk

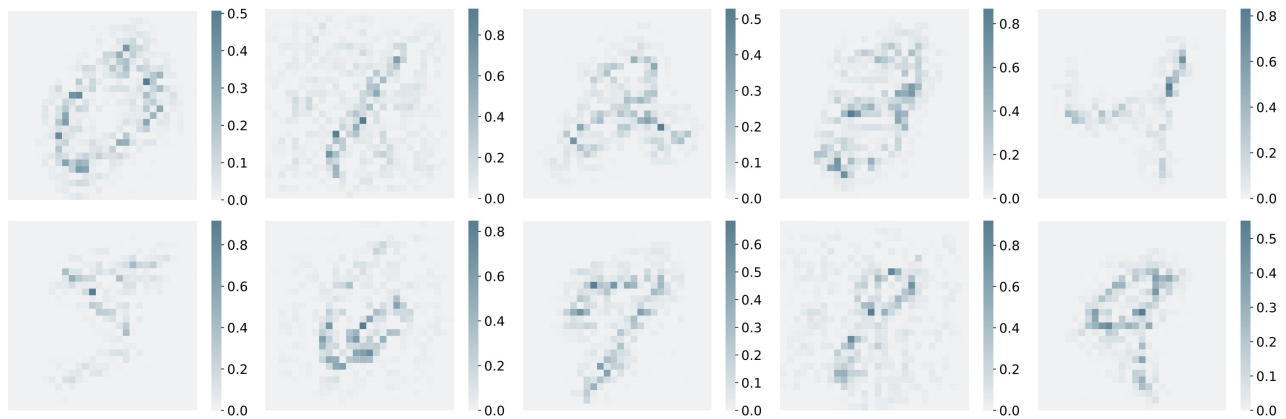

Figure 1: The difference between normalised SHAP values from two CNNs (each trained with different random seeds) for a randomly chosen sample from each MNIST class.

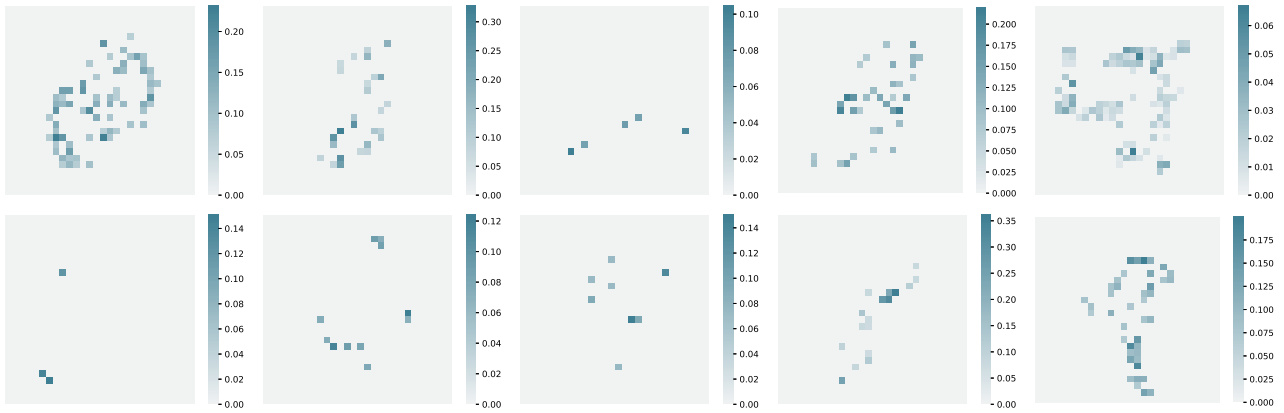

Figure 2: The difference between normalised SHAP values from two SVMs (each trained with different random seeds) for a randomly chosen sample from each MNIST class.

| Model Type  | Dataset | Dropout | Seed  | Shuffle | Explanation Accuracy | Sensitivity | Infidelity |
|-------------|---------|---------|-------|---------|----------------------|-------------|------------|
| CNN         | MNIST   | 0.0     | 1     | False   | 96                   | 2.40        | 0.0019     |
|             |         | 0.1     | 1     | False   | 97                   | 2.04        | 0.0018     |
|             |         | 0.2     | 1     | False   | 97                   | 2.02        | 0.0020     |
|             |         | 0.3     | 1     | False   | 98                   | 1.69        | 0.0019     |
|             |         | 0.4     | 1     | False   | 98                   | 1.53        | 0.0016     |
|             |         | 0.25    | 1     | False   | 98                   | 1.84        | 0.0016     |
|             |         | 0.25    | 12303 | False   | 98                   | 1.70        | 0.0014     |
|             |         | 0.25    | 15135 | False   | 98                   | 1.58        | 0.0020     |
|             |         | 0.25    | 16959 | False   | 97                   | 1.67        | 0.0018     |
|             |         | 0.25    | 20878 | False   | 98                   | 1.61        | 0.0020     |
|             |         | 0.25    | 79266 | True    | 99                   | 1.51        | 0.0014     |
| 0.25        | 79870   | True    | 99    | 1.67    | 0.0011               |             |            |
| Small-CNN   | MNIST   | 0.0     | 1     | False   | 99                   | 1.07        | 0.1810     |
|             |         | 0.2     | 1     | False   | 98                   | 1.00        | 0.1429     |
|             |         | 0.25    | 1     | False   | 98                   | 1.00        | 0.1521     |
|             |         | 0.25    | 26417 | False   | 99                   | 1.02        | 0.1011     |
|             |         | 0.25    | 91110 | True    | 99                   | 1.01        | 0.1174     |
|             |         | 0.25    | 98281 | True    | 99                   | 1.01        | 0.1402     |
| GaborNet    | MNIST   | 0.0     | 0     | False   | 99                   | 1.38        | 0.2808     |
|             |         | 0.1     | 0     | False   | 99                   | 1.41        | 0.2256     |
|             |         | 0.2     | 0     | False   | 99                   | 1.42        | 0.1900     |
|             |         | 0.3     | 0     | False   | 99                   | 1.44        | 0.1702     |
|             |         | 0.4     | 0     | False   | 99                   | 1.46        | 0.1523     |
|             |         | 0.25    | 257   | False   | 99                   | 1.17        | 0.1489     |
|             |         | 0.25    | 6339  | False   | 99                   | 1.34        | 0.2508     |
|             |         | 0.25    | 29062 | False   | 99                   | 1.40        | 0.1683     |
|             |         | 0.25    | 51303 | False   | 98                   | 1.45        | 0.2352     |
|             |         | 0.25    | 17939 | True    | 98                   | 1.34        | 0.1567     |
|             |         | 0.25    | 23682 | True    | 98                   | 1.28        | 0.1190     |
|             |         | 0.25    | 27442 | True    | 99                   | 1.31        | 0.1274     |
| 0.25        | 53307   | True    | 99    | 1.27    | 0.1089               |             |            |
| ResNet18    | MNIST   | 0.25    | 21609 | False   | 99                   | 1.15        | 0.7214     |
|             |         | 0.25    | 23474 | False   | 99                   | 0.96        | 0.4426     |
|             |         | 0.25    | 29246 | False   | 99                   | 2.34        | 0.5284     |
|             |         | 0.25    | 48769 | False   | 98                   | 0.83        | 0.5007     |
|             |         | 0.25    | 58626 | False   | 99                   | 1.21        | 0.7121     |
|             |         | 0.25    | 72    | True    | 98                   | 1.21        | 0.5572     |
|             |         | 0.25    | 1507  | True    | 98                   | 1.42        | 0.8697     |
|             |         | 0.25    | 4439  | True    | 99                   | 0.97        | 0.5402     |
|             |         | 0.25    | 10250 | True    | 99                   | 2.10        | 0.8867     |
| 0.25        | 21033   | True    | 99    | 1.01    | 0.9018               |             |            |
| MLP         | MNIST   | 0.0     | 1     | False   | 99                   | 3.49        | 0.1748     |
|             |         | 0.2     | 1     | False   | 99                   | 5.56        | 0.1573     |
|             |         | 0.25    | 1     | False   | 99                   | 4.85        | 0.1508     |
|             |         | 0.25    | 27833 | False   | 99                   | 3.76        | 0.1926     |
|             |         | 0.25    | 72    | True    | 99                   | 3.39        | 0.1427     |
|             |         | 0.25    | 79870 | True    | 99                   | 3.74        | 0.1399     |
| Densenet121 | MIMIC   | n/a     | 2     | False   | 99                   | 1.5966      | 0.9994     |
|             |         | n/a     | 3     | False   | 99                   | 1.5031      | 1.0719     |
|             |         | n/a     | 4     | False   | 99                   | 1.5987      | 1.0020     |
|             |         | n/a     | 5     | False   | 99                   | 1.1431      | 0.4659     |
|             |         | 0.25    | 6     | True    | 99                   | 1.5122      | 0.9994     |
|             |         | 0.25    | 7     | True    | 99                   | 1.6078      | 1.1217     |
| ADP         | MNIST   | n/a     | 0     | False   | 99                   | 1.2187      | 0.9110     |
|             |         | n/a     | 42    | False   | 99                   | 1.4250      | 1.4376     |
|             |         | n/a     | 100   | False   | 98                   | 1.2297      | 0.9730     |
|             |         | 0.25    | 1     | True    | 99                   | 1.3491      | 0.9912     |
|             |         | 0.25    | 10    | True    | 98                   | 1.3100      | 1.266      |
| DNE         | MIMIC   | n/a     | 1     | False   | 80                   | 1.5499      | 1.0357     |
|             |         | n/a     | 42    | False   | 84                   | 1.3709      | 0.7340     |
|             |         | 0.25    | 4242  | True    | 81                   | 1.5683      | 0.6510     |
|             |         | 0.25    | 1000  | True    | 82                   | 1.6932      | 0.8493     |
| SVM         | MNIST   | n/a     | 30828 | False   | 99                   | 1.5763      | 0.2070     |
|             |         | n/a     | 31599 | False   | 99                   | 1.1686      | 0.9074     |
|             |         | n/a     | 8253  | False   | 99                   | 1.0238      | 0.6214     |
|             |         | 0.25    | 91244 | True    | 99                   | 1.5439      | 0.5006     |
|             |         | 0.25    | 79870 | True    | 99                   | 1.5894      | 0.4823     |

Table 1: Table reporting explanation quality metrics on SHAP across all model architectures and training variations tested. DNE denotes Densenet-121 Ensemble. Where Shuffle is True, Seed refers to the seed used for shuffling the dataset and not the training seed.
